# Supplementary material for: Dual primary cancers of skin cancer and lung cancer：A case report
Source: Research Square preprint supplement (doi:10.21203/rs.3.rs-6489405/v1), 2025-07-14
Supplement: Supplementary file 1 [file 44292f169bdb8151fc3ab203.docx]

***Copyright Transfer Agreement***

The Asian Surgical Association (“the Proprietor”) will be pleased to publish your article (“the Work”),tentatively entitled

Dual primary cancers of skin cancer and lung cancer：A case report

|  |
| --- |
|  |

in the *Asian Journal of Surgery* (“the Journal”) if the Work is accepted for publication. The undersigned authors transfer all copyright ownership in and relating to the Work, in all forms and media, to the Proprietor in the event that the Work is pub- lished. However, this agreement will be null and void if the Work is not published in the Journal.

The undersigned authors warrant that the Work is original, is not under consideration by another journal, and has not been previously published.

*(This agreement must be signed by all authors. A photocopy of this form may be used if there are more than 10 authors.)*

| Author’s  Bowei  He | Name | & | Signature  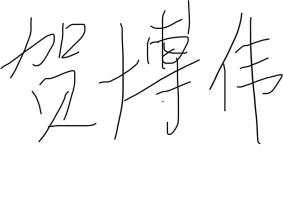 | Date  December 22, 2024 |
| --- | --- | --- | --- | --- |
| Author’s  Hanbing  Zhang | name | & | Signature  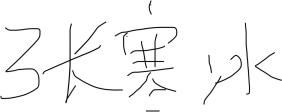 | Date  December 22, 2024 |
| Author’s  Yu Guo | name | & | Signature  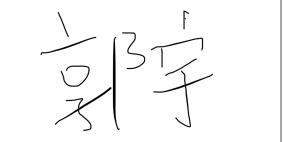 | Date  December 24, 2024 |
| Author’s  Yongbin  Song | name | & | Signature  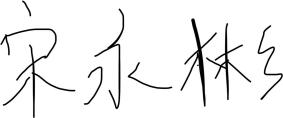 | Date |

Author’s name & signature

Date

| Author’s | name | & | signature | Date |
| --- | --- | --- | --- | --- |
| Author’s | name | & | signature | Date |
| Author’s | name | & | signature | Date |
| Author’s | name | & | signature | Date |

Author’s name & signature

Date
