# Supplementary material for: Dual primary cancers of skin cancer and lung cancer：A case report
Source: Research Square preprint supplement (doi:10.21203/rs.3.rs-6489405/v1), 2025-07-14
Supplement: Supplementary file 2 [file d7bb1529ed0c98301cf6fc47.docx]

####
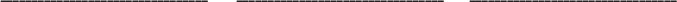


***Publication Checklist***

**Manuscript title:** Dual primary cancers of skin cancer and lung cancer：A case report

*For the Guide for Authors, the *Authorship & Conﬂicts of Interest Statement* form, and the *Copyright Transfer Agreement* form, please go to the Journal's website at <http://www.e-asianjournalsurgery.com/>

**Only complete manuscript submissions will be considered for publication. Complete submission must include:**


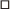
√ Cover letter for manuscript submission signed by the corresponding author


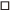
√Authorship & conflicts of interest statement signed by all authors listed in the manuscript


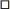
√Copyright transfer agreement signed by all authors listed in the manuscript


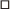
√Manuscript in MS Word format

*AND, where applicable*


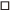
 Letter of approval from review committee for use of human samples in research and human experiments


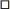
 Letter of approval from relevant authority for use of animals in experiments


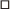
 CONSORT ﬂow chart for randomized controlled trial


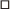
 Signed consent to publish (in print and online) from human subjects who can be identiied in your manuscript


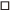
 Letter(s) of permission from copyright holder(s) to use or adapt copyrighted sources in your manuscript

**In the actual article, the following information must be provided:**

√
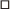
 Title page

🗹Article category

🗹Article title

🗹 Name(s) and afiliation(s) of author(s)

🗹 Conﬂicts of interest statement

🗹 Corresponding author details (name, e-mail, mailing address, telephone and fax numbers)

🗹 Running title not exceeding 50 characters


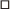
 Abstract (no more than 250 words)


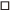
 3–5 keywords in alphabetical order for all article categories except Letters to the Editor (MeSH terms are recommended; see <http://www.ncbi.nlm.nih.gov/mesh?term>)


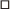
 Main text


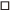
 References in the correct format, cited in numerical order, and all references in the List are cited in the Text/Tables/Figures, and vice versa

*AND, where applicable*


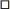
 Acknowledgments


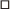
 Table headings and tables, each on a new page


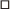
 Figure legends, on a new page


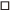
 Electronic picture iles of alligures; resolution of 300 dpi for halftone images, 600 dpi for combination art (halftone + line art), and 1000 dpi for line art

**The following must be provided:**


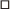
 All authors acknowledge and agree that they will be charged a publication fee of $1200 USD upon acceptance of this article. Corresponding author's name (typed) Corresponding author's signature Date

Yongbin Song
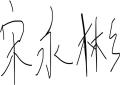
 2025-02-01

(on behalf of all the listed authors in the manuscript)
